# Supplementary material for: Surgical treatment and survival from colorectal cancer in Denmark, England, Norway, and Sweden: a population-based study
Source: PubMed Central journal article supplement — Lancet Oncol. 2019 Jan;20(1):74–87. doi: 10.1016/S1470-2045(18)30646-6 (PMC6318222; doi:10.1016/s1470-2045(18)30646-6), 2019-01
Supplement: mmc1.pdf [file mmc1.pdf]

# THE LANCET Oncology

## Supplementary appendix

This appendix formed part of the original submission and has been peer reviewed. We post it as supplied by the authors.

Supplement to: Majano SB, Di Girolamo C, Rachet B, et al. Surgical treatment and survival from colorectal cancer in Denmark, England, Norway, and Sweden: a population-based study. *Lancet Oncol* 2018; published online Dec 10. [http://dx.doi.org/10.1016/S1470-2045\(18\)30646-6](http://dx.doi.org/10.1016/S1470-2045(18)30646-6).

| Data received according to data specification | Colon tumours |              |               |               |               |               |              |              |               |               |               |               |
|-----------------------------------------------|---------------|--------------|---------------|---------------|---------------|---------------|--------------|--------------|---------------|---------------|---------------|---------------|
|                                               | Denmark       |              |               | England       |               |               | Norway       |              |               | Sweden        |               |               |
|                                               | Records       | Patients     | Percentage    | Records       | Patients      | Percentage    | Records      | Patients     | Percentage    | Records       | Patients      | Percentage    |
|                                               | <b>8,856</b>  | <b>8,815</b> | <b>100.00</b> | <b>71,292</b> | <b>71,292</b> | <b>100.00</b> | <b>9,006</b> | <b>8,668</b> | <b>100.00</b> | <b>12,168</b> | <b>11,790</b> | <b>100.00</b> |
| Ineligible morphology*                        | 206           | 204          | 2.31          | 1,359         | 1,359         | 1.91          | 241          | 222          | 2.56          | 0             | 0             | 0.00          |
| Ineligible topography**                       | 0             | 0            | 0.00          | 0             | 0             | 0.00          | 0            | 0            | 0.00          | 0             | 0             | 0.00          |
| Aged < 18 years                               | 0             | 0            | 0.00          | 4             | 4             | 0.01          | 0            | 0            | 0.00          | 0             | 0             | 0.00          |
| Aged 100+ years                               | 2             | 2            | 0.02          | 0             | 0             | 0.00          | 2            | 2            | 0.02          | 1             | 1             | 0.01          |
| <b>Total ineligible</b>                       | <b>208</b>    | <b>206</b>   | <b>2.34</b>   | <b>1,363</b>  | <b>1,363</b>  | <b>100.00</b> | <b>243</b>   | <b>224</b>   | <b>2.58</b>   | <b>1</b>      | <b>1</b>      | <b>0.01</b>   |
| <b>Total eligible</b>                         | <b>8,648</b>  | <b>8,609</b> | <b>100.00</b> | <b>69,929</b> | <b>69,929</b> | <b>100.00</b> | <b>8,763</b> | <b>8,444</b> | <b>100.00</b> | <b>12,167</b> | <b>11,789</b> | <b>100.00</b> |
| Age-site mismatch                             | 0             | 0            | 0.00          | 0             | 0             | 0.00          | 0            | 0            | 0.00          | 0             | 0             | 0.00          |
| Age-site-morphology mismatch                  | 3             | 3            | 0.03          | 3             | 3             | 0.00          | 1            | 1            | 0.01          | 1             | 1             | 0.01          |
| Invalid dates                                 | 3             | 3            | 0.03          | 0             | 0             | 0.00          | 5            | 5            | 0.06          | 2             | 2             | 0.02          |
| Death certificate only                        | 36            | 36           | 0.42          | 0             | 0             | 0.00          | 99           | 99           | 1.17          | 0             | 0             | 0.00          |
| Duplicate registration***                     | 0             | 0            | 0.00          | 0             | 0             | 0.00          | 0            | 0            | 0.00          | 0             | 0             | 0.00          |
| Synchronous tumour***                         | 0             | 0            | 0.00          | 0             | 0             | 0.00          | 4            | 2            | 0.02          | 193           | 95            | 0.81          |
| Multiple primary same site***                 | 77            | 38           | 0.44          | 0             | 0             | 0.00          | 607          | 290          | 3.43          | 539           | 259           | 2.20          |
| <b>Total exclusions</b>                       | <b>81</b>     | <b>42</b>    | <b>0.49</b>   | <b>3</b>      | <b>3</b>      | <b>0.00</b>   | <b>424</b>   | <b>105</b>   | <b>1.24</b>   | <b>381</b>    | <b>3</b>      | <b>0.03</b>   |
| <b>Included in analysis</b>                   | <b>8,567</b>  | <b>8,567</b> |               | <b>69,926</b> | <b>69,926</b> |               | <b>8,339</b> | <b>8,339</b> |               | <b>11,786</b> | <b>11,786</b> |               |

\*: Specific non-adenocarcinoma ICD-O-3 morphological codes; \*\*: Topographical codes C21.X (anal tumours). \*\*\*: Total exclusions do not include patients in this row because one record is kept for each.

**Appendix Table 1. Data quality control (ineligible and excluded records) by country - Colon cancer diagnoses 2010-2012.**

| Data received according to data specification | Rectal tumours |              |               |               |               |               |              |              |               |              |              |               |
|-----------------------------------------------|----------------|--------------|---------------|---------------|---------------|---------------|--------------|--------------|---------------|--------------|--------------|---------------|
|                                               | Denmark        |              |               | England       |               |               | Norway       |              |               | Sweden       |              |               |
|                                               | Records        | Patients     | Percentage    | Records       | Patients      | Percentage    | Records      | Patients     | Percentage    | Records      | Patients     | Percentage    |
|                                               | <b>4,476</b>   | <b>4,474</b> | <b>100.00</b> | <b>28,650</b> | <b>28,650</b> | <b>100.00</b> | <b>3,453</b> | <b>3,438</b> | <b>100.00</b> | <b>5,832</b> | <b>5,800</b> | <b>100.00</b> |
| Ineligible morphology*                        | 72             | 70           | 1.56          | 948           | 948           | 3.31          | 291          | 288          | 8.38          | 0            | 0            | 0.00          |
| Ineligible topography**                       | 0              | 0            | 0.00          | 103           | 103           | 0.36          | 17           | 17           | 0.49          | 0            | 0            | 0.00          |
| Aged < 18 years                               | 1              | 1            | 0.02          | 0             | 0             | 0.00          | 0            | 0            | 0.00          | 1            | 1            | 0.02          |
| Aged 100+ years                               | 1              | 1            | 0.02          | 0             | 0             | 0.00          | 1            | 1            | 0.03          | 1            | 1            | 0.02          |
| <b>Total ineligible</b>                       | <b>74</b>      | <b>72</b>    | <b>1.61</b>   | <b>1,051</b>  | <b>1,051</b>  | <b>100.00</b> | <b>309</b>   | <b>306</b>   | <b>8.90</b>   | <b>2</b>     | <b>2</b>     | <b>0.03</b>   |
| <b>Total eligible</b>                         | <b>4,402</b>   | <b>4,402</b> | <b>100.00</b> | <b>27,599</b> | <b>27,599</b> | <b>100</b>    | <b>3,144</b> | <b>3,132</b> | <b>100.00</b> | <b>5,830</b> | <b>5,798</b> | <b>100.00</b> |
| Age-site mismatch                             | 0              | 0            | 0.00          | 0             | 0             | 0.00          | 0            | 0            | 0.00          | 1            | 1            | 0.02          |
| Age-site-morphology mismatch                  | 0              | 0            | 0.00          | 0             | 0             | 0.00          | 0            | 0            | 0.00          | 0            | 0            | 0.00          |
| Invalid dates                                 | 7              | 7            | 0.16          | 0             | 0             | 0.00          | 4            | 4            | 0.13          | 0            | 0            | 0.00          |
| Death certificate only                        | 4              | 4            | 0.09          | 0             | 0             | 0.00          | 17           | 17           | 0.54          | 0            | 0            | 0.00          |
| Duplicate registration***                     | 0              | 0            | 0.00          | 0             | 0             | 0.00          | 0            | 0            | 0.00          | 0            | 0            | 0.00          |
| Synchronous tumour***                         | 0              | 0            | 0.00          | 0             | 0             | 0.00          | 2            | 1            | 0.03          | 56           | 28           | 0.48          |
| Multiple primary same site***                 | 0              | 0            | 0.00          | 0             | 0             | 0.00          | 22           | 11           | 0.35          | 8            | 4            | 0.07          |
| <b>Total exclusions</b>                       | <b>11</b>      | <b>11</b>    | <b>0.25</b>   | <b>0</b>      | <b>0</b>      | <b>0.00</b>   | <b>33</b>    | <b>21</b>    | <b>0.67</b>   | <b>33</b>    | <b>1</b>     | <b>0.02</b>   |
| <b>Included in analysis</b>                   | <b>4,391</b>   | <b>4,391</b> |               | <b>27,599</b> | <b>27,599</b> |               | <b>3,111</b> | <b>3,111</b> |               | <b>5,797</b> | <b>5,797</b> |               |

\*: Specific non-adenocarcinoma ICD-O-3 morphological codes; \*\*: Topographical codes C21.X (anal tumours). \*\*\*: Total exclusions do not include patients in this row because one record is kept for each.

**Appendix Table 2. Data quality control (ineligible and excluded records) by country - Rectal cancer diagnoses 2010-2012.**

|                                                                                                                                                                                  | Colon tumours |               |              |              | Rectal tumours |               |              |              |
|----------------------------------------------------------------------------------------------------------------------------------------------------------------------------------|---------------|---------------|--------------|--------------|----------------|---------------|--------------|--------------|
|                                                                                                                                                                                  | Denmark       | England       | Norway       | Sweden       | Denmark        | England       | Norway       | Sweden       |
|                                                                                                                                                                                  | n (%)         | n (%)         | n (%)        | n (%)        | n (%)          | n (%)         | n (%)        | n (%)        |
| <b>Age</b>                                                                                                                                                                       |               |               |              |              |                |               |              |              |
| 15-54                                                                                                                                                                            | 463 (70.2)    | 4,237 (74.3)  | 495 (75.5)   | 712 (82.5)   | 371 (77.1)     | 2,065 (66.4)  | 248 (71.7)   | 465 (74.3)   |
| 55-64                                                                                                                                                                            | 1,091 (73.7)  | 8,956 (75.7)  | 990 (73.6)   | 1,442 (80.3) | 705 (75.4)     | 4,083 (68.8)  | 499 (73.5)   | 860 (78.0)   |
| 65-74                                                                                                                                                                            | 2,077 (73.1)  | 15,554 (76.2) | 1,844 (75.5) | 2,999 (82.1) | 1,072 (71.4)   | 5,733 (68.6)  | 664 (70.2)   | 1,439 (75.7) |
| 75-84                                                                                                                                                                            | 1,818 (70.8)  | 14,855 (67.6) | 1,974 (73.9) | 3,255 (83.3) | 698 (63.1)     | 3,962 (54.4)  | 510 (63.0)   | 1,090 (69.0) |
| 84-99                                                                                                                                                                            | 468 (62.8)    | 3,386 (48.3)  | 553 (62.2)   | 915 (77.2)   | 118 (44.5)     | 593 (28.9)    | 124 (52.3)   | 208 (47.4)   |
| <b>Sex</b>                                                                                                                                                                       |               |               |              |              |                |               |              |              |
| Male                                                                                                                                                                             | 2,875 (70.7)  | 25,362 (70.0) | 2,869 (72.1) | 4,614 (80.5) | 1,837 (69.6)   | 10,772 (62.1) | 1,232 (68.2) | 2,410 (71.5) |
| Female                                                                                                                                                                           | 3,042 (72.0)  | 21,626 (70.5) | 2,987 (74.3) | 4,709 (83.0) | 1,127 (68.3)   | 5,664 (60.2)  | 813 (67.2)   | 1,652 (72.6) |
| <b>Stage at diagnosis</b>                                                                                                                                                        |               |               |              |              |                |               |              |              |
| I                                                                                                                                                                                | 741 (89.7)    | 6,860 (93.9)  | 816 (86.3)   | 1,299 (91.0) | 739 (93.5)     | 5,058 (90.6)  | 599 (85.9)   | 1,106 (90.5) |
| II                                                                                                                                                                               | 2,463 (93.0)  | 16,040 (94.4) | 2,115 (88.3) | 3,434 (97.3) | 922 (90.2)     | 3,927 (80.0)  | 551 (84.8)   | 1,134 (91.4) |
| III                                                                                                                                                                              | 1,816 (90.9)  | 15,280 (91.0) | 1,637 (88.0) | 3,184 (95.8) | 892 (85.4)     | 5,269 (71.2)  | 534 (84.1)   | 1,344 (88.3) |
| IV                                                                                                                                                                               | 870 (39.7)    | 6,185 (41.0)  | 1,139 (56.9) | 1,334 (51.2) | 305 (33.3)     | 1,287 (26.3)  | 328 (48.2)   | 376 (29.6)   |
| Unknown                                                                                                                                                                          | 27 (4.3)      | 2,623 (24.4)  | 149 (18.7)   | 72 (13.9)    | 106 (20.5)     | 895 (22.6)    | 33 (9.3)     | 102 (26.1)   |
| <b>Total</b>                                                                                                                                                                     | 5,917 (71.3)  | 46,988 (70.2) | 5,856 (73.2) | 9,323 (81.7) | 2,964 (69.1)   | 16,436 (61.5) | 2,045 (67.8) | 4,062 (71.9) |
| <p>Resectional surgery: Surgery removing the primary tumour, within nine months of diagnosis, excluding diagnostic, and palliative procedures.</p>                               |               |               |              |              |                |               |              |              |
| <p><b>Appendix Table 3. Proportion of surgically-treated patients below age 90 years by age, sex and stage at diagnosis, colorectal adenocarcinoma diagnoses, 2010-2012.</b></p> |               |               |              |              |                |               |              |              |

| Age            | Life expectancy in years |         |        |        |
|----------------|--------------------------|---------|--------|--------|
|                | Denmark                  | England | Norway | Sweden |
| <b>Females</b> |                          |         |        |        |
| 70             | 15.8                     | 16.3    | 16.8   | 16.8   |
| 75             | 12.3                     | 12.7    | 13.0   | 13.0   |
| 80             | 9.2                      | 9.5     | 9.6    | 9.6    |
| 85             | 6.6                      | 6.7     | 6.8    | 6.8    |
| 90             | 4.4                      | 4.5     | 4.4    | 4.4    |
| <b>Males</b>   |                          |         |        |        |
| 70             | 13.3                     | 14.0    | 14.0   | 14.3   |
| 75             | 10.2                     | 10.7    | 10.6   | 10.9   |
| 80             | 7.5                      | 7.9     | 7.7    | 7.9    |
| 85             | 5.3                      | 5.6     | 5.4    | 5.5    |
| 90             | 3.6                      | 3.8     | 3.6    | 3.6    |

Based on population-based life tables produced by the London School of Hygiene & Tropical Medicine.<sup>1</sup>

---

**Appendix Table 4. Life expectancy in people aged 70+ years in the general population, 2010.**

|                      | Colon tumours |              |            |              | Rectal tumours |              |            |            |
|----------------------|---------------|--------------|------------|--------------|----------------|--------------|------------|------------|
|                      | Denmark       | England      | Norway     | Sweden       | Denmark        | England      | Norway     | Sweden     |
|                      | n (%)         | n (%)        | n (%)      | n (%)        | n (%)          | n (%)        | n (%)      | n (%)      |
| <b>Stage I</b>       |               |              |            |              |                |              |            |            |
| Radiotherapy         | 2 (0.2)       | 132 (1.8)    | 2 (0.2)    | 2 (0.1)      | 218 (27.5)     | 1,934 (34.1) | 260 (36.9) | 613 (49.2) |
| Chemotherapy         | 36 (4.3)      | 137 (1.8)    | 12 (1.2)   | 21 (1.4)     | 207 (26.1)     | 649 (11.4)   | 162 (23.0) | 118 (9.5)  |
| <b>Stage II</b>      |               |              |            |              |                |              |            |            |
| Radiotherapy         | 21 (0.8)      | 389 (2.2)    | 19 (0.8)   | 23 (0.6)     | 282 (27.3)     | 2,414 (48.1) | 344 (52.2) | 817 (64.6) |
| Chemotherapy         | 527 (19.4)    | 2,798 (16.0) | 115 (4.6)  | 417 (11.4)   | 371 (35.9)     | 1,369 (27.3) | 241 (36.6) | 266 (21.0) |
| <b>Stage III</b>     |               |              |            |              |                |              |            |            |
| Radiotherapy         | 20 (1.0)      | 662 (3.8)    | 19 (1.0)   | 11 (0.3)     | 303 (28.5)     | 4,084 (54.3) | 305 (47.3) | 991 (63.9) |
| Chemotherapy         | 1,254 (61.6)  | 8,143 (47.2) | 827 (42.8) | 1,774 (51.6) | 720 (67.8)     | 3,488 (46.4) | 233 (36.1) | 741 (47.8) |
| <b>Stage IV</b>      |               |              |            |              |                |              |            |            |
| Radiotherapy         | 81 (3.6)      | 564 (3.6)    | 54 (2.6)   | 14 (0.5)     | 217 (23.2)     | 1,776 (35.3) | 286 (40.9) | 390 (30.1) |
| Chemotherapy         | 1,361 (60.3)  | 6,426 (41.0) | 672 (32.3) | 298 (11.2)   | 624 (66.7)     | 2,516 (50.1) | 271 (38.8) | 205 (15.8) |
| <b>Missing stage</b> |               |              |            |              |                |              |            |            |
| Radiotherapy         | 10 (1.4)      | 350 (2.9)    | 15 (1.7)   | 4 (0.7)      | 162 (28.5)     | 1,091 (25.0) | 126 (31.3) | 124 (28.1) |
| Chemotherapy         | 94 (13.2)     | 1,136 (9.5)  | 28 (3.2)   | 15 (2.6)     | 138 (24.3)     | 462 (10.6)   | 24 (6.0)   | 74 (16.8)  |

Notes: Missing data on chemotherapy (all countries), and radiotherapy (Denmark and England) mean that the figures presented are not fully comparable. Cautious interpretation is advised.

**Appendix Table 5. Proportion of patients with evidence of receiving radiotherapy and chemotherapy by stage, colorectal adenocarcinoma diagnoses 2010-2012.**

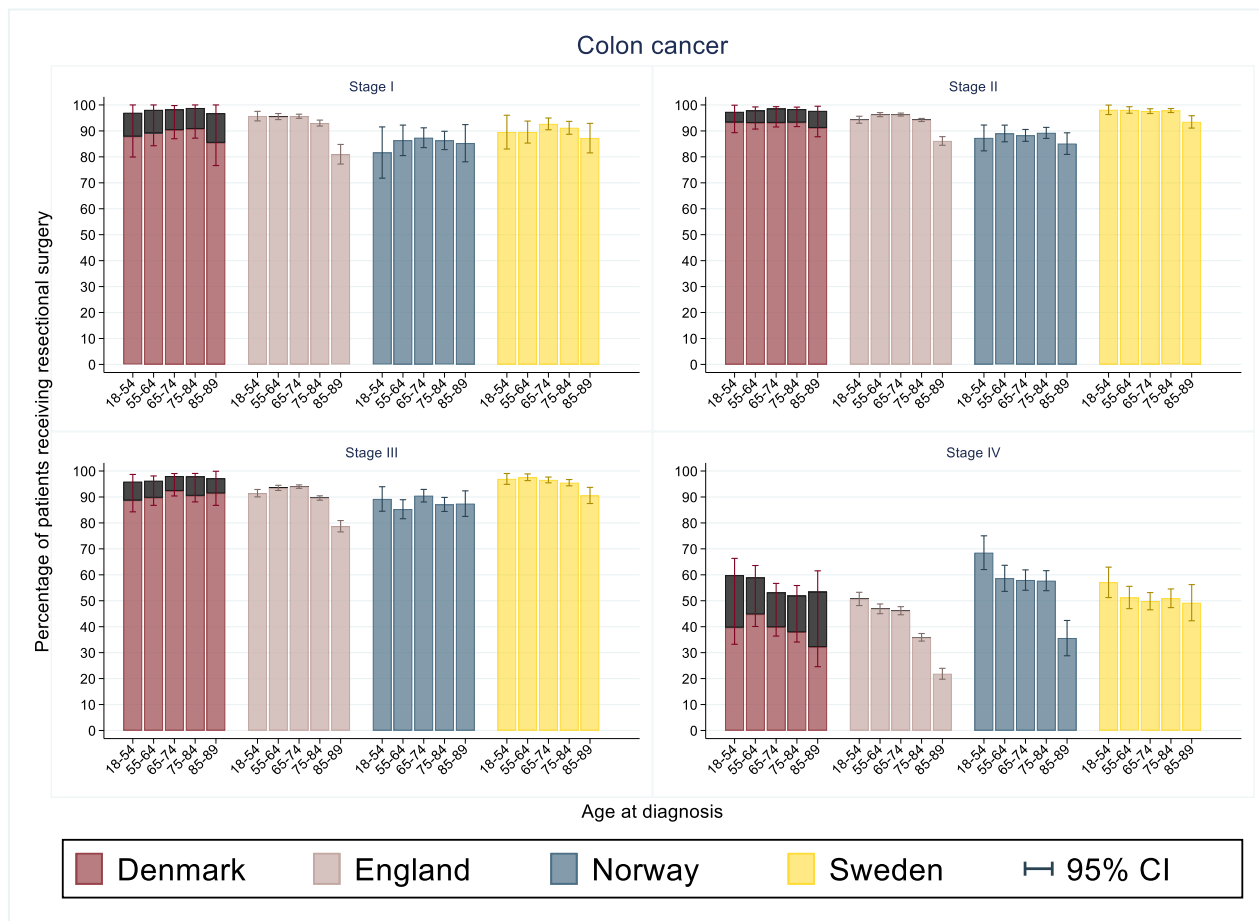

**Appendix Figure 1a: Proportion of patients younger than 90 years with evidence of receiving resectional surgery for colon adenocarcinoma, by stage at diagnosis and age group, diagnoses 2010-2012.**

To be compared with Figure 2a; Resectional surgery: Surgery removing the primary tumour, within nine months of diagnosis, excluding diagnostic and palliative procedures. For Norway and Sweden, we had information on surgical status for all patients. Information on surgery was missing for some patients in Denmark and for a tiny proportion of patients in England. The dark shaded areas at the top of the bars for Denmark and (less visible) for England represent the proportion of patients with unknown surgical status, by stage and age-group. The overall height of the bars represents the proportion we would observe if all of the patients with missing treatment data had received surgery.

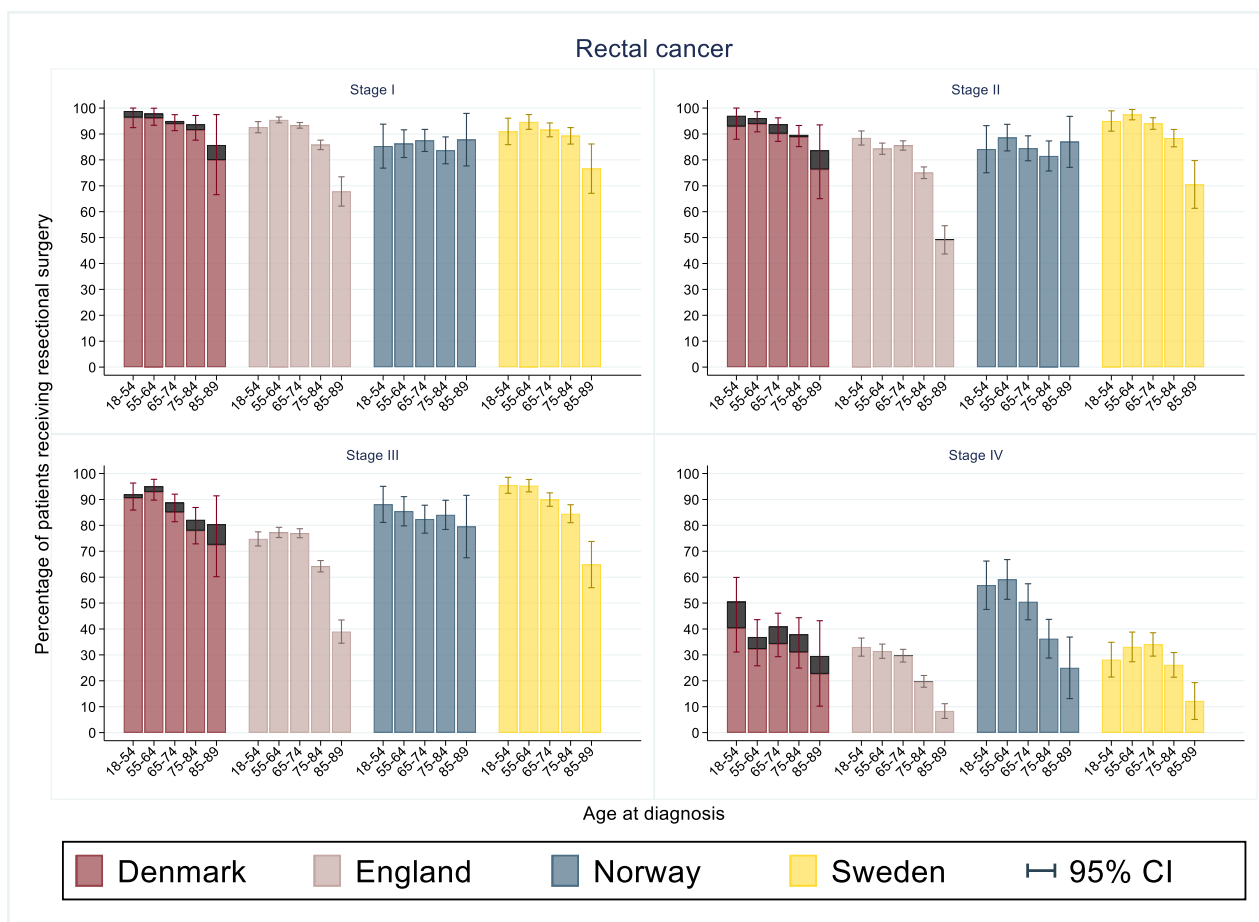

**Appendix Figure 1b: Proportion of patients younger than 90 years with evidence of receiving resectional surgery for rectal adenocarcinoma, by stage at diagnosis and age group, diagnoses 2010-2012.**

To be compared with Figure 2b; Resectional surgery: Surgery removing the primary tumour, within nine months of diagnosis, excluding diagnostic and palliative procedures. For Norway and Sweden, we had information on surgical status for all patients. Information on surgery was missing for some patients in Denmark and for a tiny proportion of patients in England. The dark shaded areas at the top of the bars for Denmark and (less visible) for England represent the proportion of patients with unknown surgical status, by stage and age-group. The overall height of the bars represents the proportion we would observe if all of the patients with missing treatment data had received surgery.

## References

1. London School of Hygiene & Tropical Medicine Cancer Survival Group. Cancer Survival Group UK life tables London: London School of Hygiene & Tropical Medicine; 2015 [Last accessed 10/08/2018]. Available from: <http://csg.lshtm.ac.uk/tools-analysis/uk-life-tables/>.
